# Supplementary material for: Preoperative profiles of plasma amino acids and derivatives distinguish periampullary cancer and benign disease
Source: PubMed Central journal article supplement (PMC11067218; doi:10.1186/s12885-024-12320-8), 2024-05-03

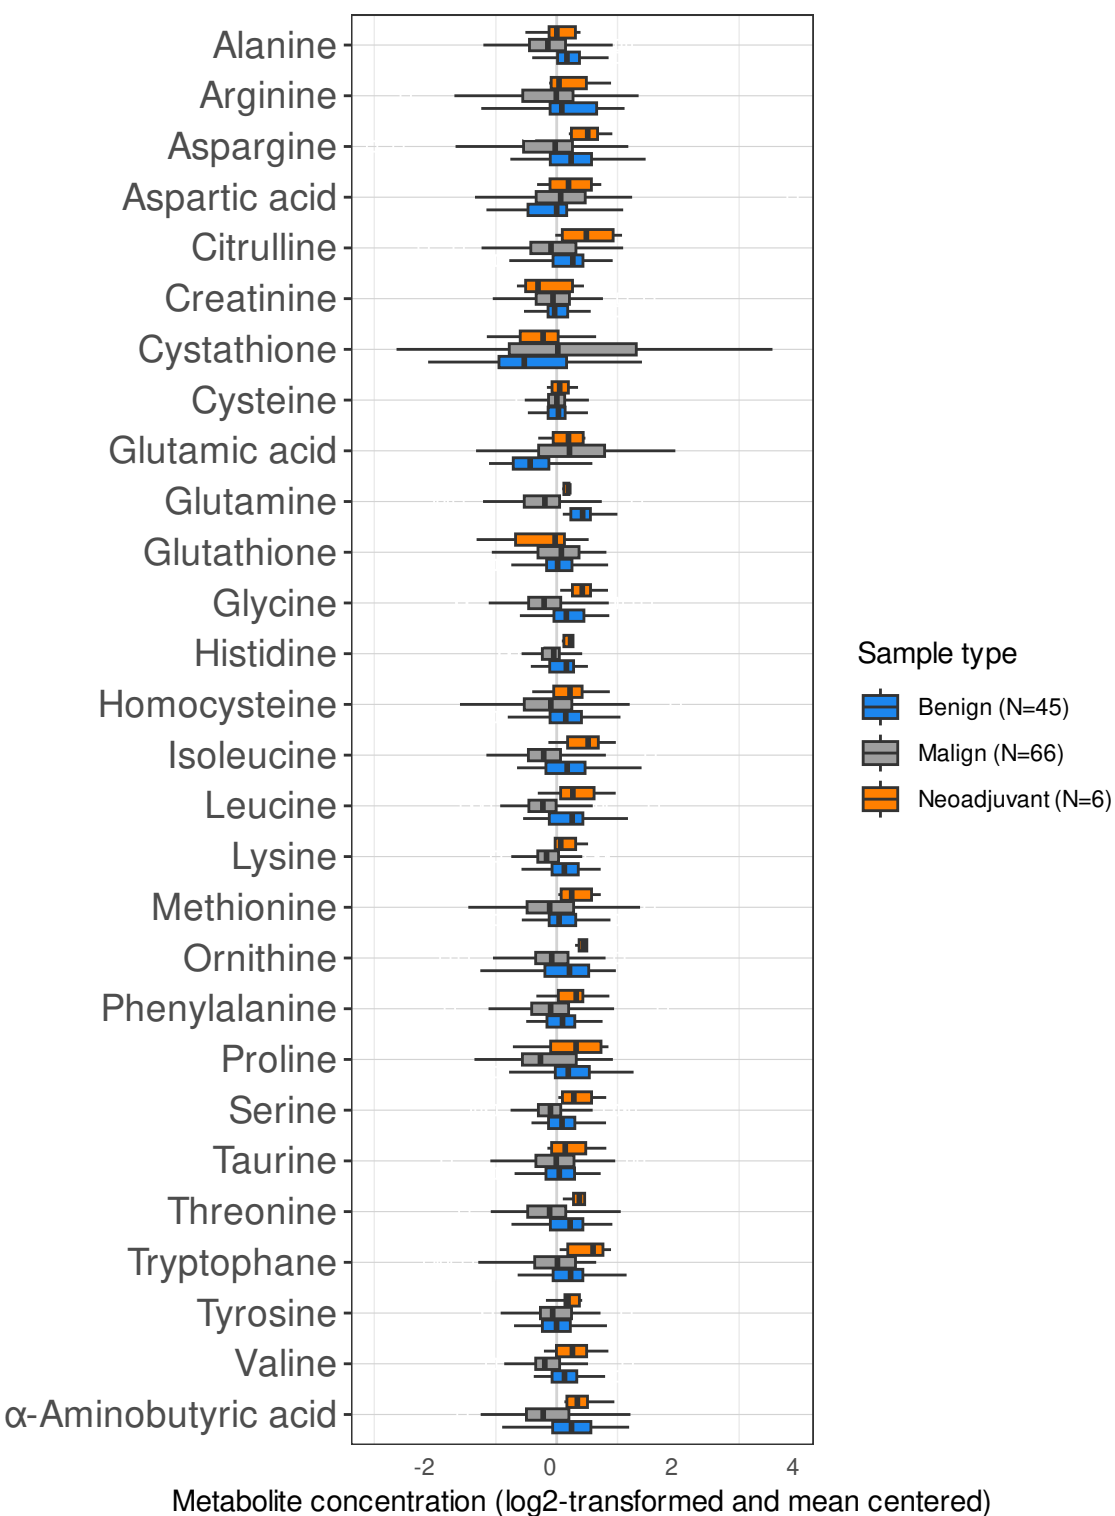

Supplement: 12885_2024_12320_MOESM6_ESM.pdf [file 12885_2024_12320_MOESM6_ESM.pdf]
