# Supplementary material for: Preoperative profiles of plasma amino acids and derivatives distinguish periampullary cancer and benign disease
Source: PubMed Central journal article supplement (PMC11067218; doi:10.1186/s12885-024-12320-8), 2024-05-03
Supplement: 12885_2024_12320_MOESM11_ESM.pdf [file 12885_2024_12320_MOESM11_ESM.pdf]

Survival probability

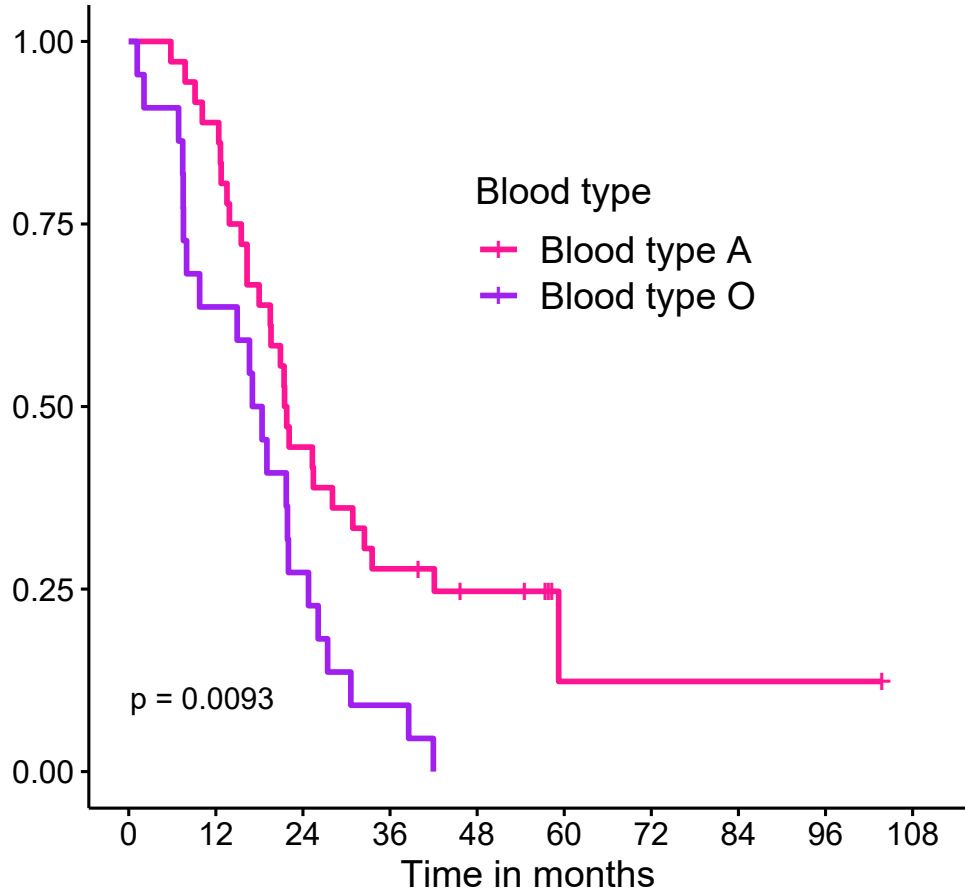

Number at risk

|              |    |    |    |    |   |   |   |   |   |   |
|--------------|----|----|----|----|---|---|---|---|---|---|
| Blood type A | 36 | 32 | 16 | 10 | 7 | 1 | 1 | 1 | 1 | 0 |
| Blood type O | 22 | 14 | 6  | 2  | 0 | 0 | 0 | 0 | 0 | 0 |
