# Supplementary material for: Preoperative profiles of plasma amino acids and derivatives distinguish periampullary cancer and benign disease
Source: PubMed Central journal article supplement (PMC11067218; doi:10.1186/s12885-024-12320-8), 2024-05-03
Supplement: 12885_2024_12320_MOESM14_ESM.pdf [file 12885_2024_12320_MOESM14_ESM.pdf]

Survival probability

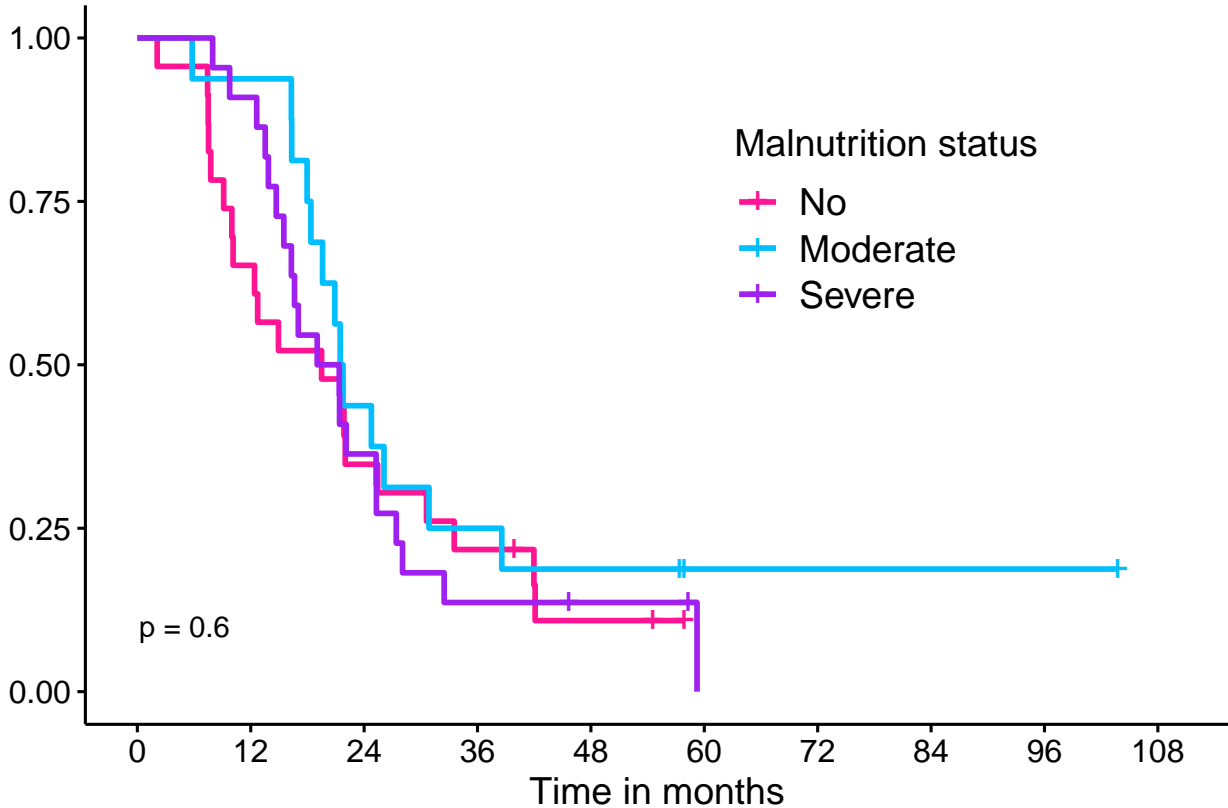

Number at risk

|          |    |    |   |   |   |   |   |   |   |   |
|----------|----|----|---|---|---|---|---|---|---|---|
| No       | 23 | 15 | 8 | 5 | 2 | 0 | 0 | 0 | 0 | 0 |
| Moderate | 16 | 15 | 7 | 4 | 3 | 1 | 1 | 1 | 1 | 0 |
| Severe   | 22 | 20 | 8 | 3 | 2 | 0 | 0 | 0 | 0 | 0 |
