# Supplementary material for: Preoperative profiles of plasma amino acids and derivatives distinguish periampullary cancer and benign disease
Source: PubMed Central journal article supplement (PMC11067218; doi:10.1186/s12885-024-12320-8), 2024-05-03
Supplement: 12885_2024_12320_MOESM15_ESM.pdf [file 12885_2024_12320_MOESM15_ESM.pdf]

Survival probability

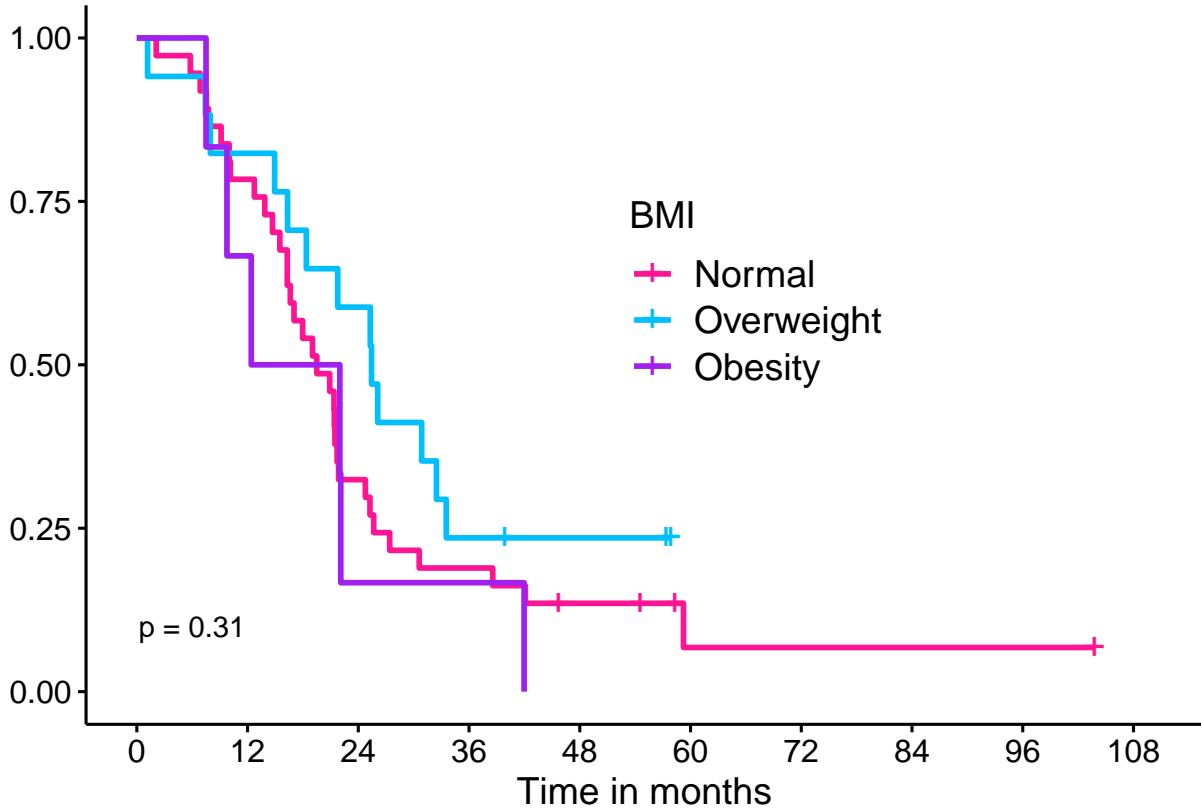

Number at risk

|            |    |    |    |   |   |   |   |   |   |   |
|------------|----|----|----|---|---|---|---|---|---|---|
| Normal     | 37 | 29 | 12 | 7 | 4 | 1 | 1 | 1 | 1 | 0 |
| Overweight | 17 | 14 | 10 | 4 | 3 | 0 | 0 | 0 | 0 | 0 |
| Obesity    | 6  | 4  | 1  | 1 | 0 | 0 | 0 | 0 | 0 | 0 |
